# Supplementary material for: A systematic review and Bayesian meta-analysis provide evidence for an effect of acute physical activity on cognition in young adults
Source: PubMed Central journal article supplement (PMC11358546; doi:10.1038/s44271-024-00124-2), 2024-08-28
Supplement: 44271_2024_124_MOESM2_ESM.pdf [file 44271_2024_124_MOESM2_ESM.pdf]

**Supplementary Table 1.** Cognitive task classification criteria.

| Cognitive Task                               | Classified Domain  | EF Sub-Domain     |
|----------------------------------------------|--------------------|-------------------|
| 0-back                                       | Attention          | -                 |
| Attention Networks Test (Overall & Alerting) | Attention          | -                 |
| Connors/ Rosvold Continuous Performance Test | Attention          | -                 |
| Continual Processing Task                    | Attention          | -                 |
| Continuous Monitoring Task                   | Attention          | -                 |
| Continuous Visual Attention Task             | Attention          | -                 |
| Digit Symbol Coding                          | Attention          | -                 |
| Digital Finger Tapping Test                  | Attention          | -                 |
| Divided Attention Task                       | Attention          | -                 |
| Dot-Probe Task                               | Attention          | -                 |
| Global vs Local Detection                    | Attention          | -                 |
| Go/No-Go Task (Redundant Target)             | Attention          | -                 |
| Harris Concentration Grid Test               | Attention          | -                 |
| Internal Shift Task                          | Attention          | -                 |
| Landolt C Test                               | Attention          | -                 |
| Multitasking Test                            | Attention          | -                 |
| Oddball Task                                 | Attention          | -                 |
| Paced Auditory Serial Addition Test          | Attention          | -                 |
| Perception and Attention Function battery    | Attention          | -                 |
| Posner Cueing Task                           | Attention          | -                 |
| Pro-Response Task                            | Attention          | -                 |
| Spatial Cueing                               | Attention          | -                 |
| Stroop Task (Congruent)                      | Attention          | -                 |
| Sustained Attention to Response Task         | Attention          | -                 |
| Trail Making Test A                          | Attention          | -                 |
| Vienna Test Task                             | Attention          | -                 |
| Viral Video Prospective Memory (detection)   | Attention          | -                 |
| Visual Search                                | Attention          | -                 |
| Visual Threat Detection                      | Attention          | -                 |
| Visual Vigilance                             | Attention          | -                 |
| Anti-Response Task                           | Executive Function | Cognitive Control |
| Digit Symbol Substitution                    | Executive Function | Cognitive Control |
| Task Switching Paradigm                      | Executive Function | Cognitive Control |
| Trail Making B                               | Executive Function | Cognitive Control |
| Decision and Shoot Task                      | Executive Function | Decision Making   |
| Logical Reasoning Task                       | Executive Function | Decision Making   |
| Naval Choice RT Task                         | Executive Function | Decision Making   |
| Soccer specific decision making task         | Executive Function | Decision Making   |
| Speed-discrimination task                    | Executive Function | Decision Making   |
| Angram Task                                  | Executive Function | Flexibility       |

|                                                        |                        |                |
|--------------------------------------------------------|------------------------|----------------|
| Dimension Switching Task                               | Executive Function     | Flexibility    |
| Anti-saccade Task                                      | Executive Function     | Inhibition     |
| Flanker Task                                           | Executive Function     | Inhibition     |
| Go/No-Go + Flanker Task                                | Executive Function     | Inhibition     |
| Go/No-Go Task                                          | Executive Function     | Inhibition     |
| Simon Task                                             | Executive Function     | Inhibition     |
| Simple/Complex Visual Discrimination Task              | Executive Function     | Inhibition     |
| Stroop Task (Incongruent/Interference)                 | Executive Function     | Inhibition     |
| Controlled Oral Word Association Test                  | Executive Function     | Language       |
| Ruff Figural Fluency Task                              | Executive Function     | Language       |
| Tower of London                                        | Executive Function     | Planning       |
| N-back (N > 0)                                         | Executive Function     | Working Memory |
| Auditory Consonant Trigram Test                        | Executive Function     | Working Memory |
| Brown-Peterson Test                                    | Executive Function     | Working Memory |
| Code Substitution                                      | Executive Function     | Working Memory |
| Deese-Roediger-McDermott Paradigm (Recall immediately) | Executive Function     | Working Memory |
| Delayed matching-to-sample task                        | Executive Function     | Working Memory |
| Digit Span                                             | Executive Function     | Working Memory |
| Letter Number Sequencing                               | Executive Function     | Working Memory |
| Math Problems Task                                     | Executive Function     | Working Memory |
| Non-Verbal Memory Test                                 | Executive Function     | Working Memory |
| Operation Span Task                                    | Executive Function     | Working Memory |
| Phoneme Monitoring                                     | Executive Function     | Working Memory |
| Plus-Minus Task                                        | Executive Function     | Working Memory |
| Self-Ordered Pointing Test                             | Executive Function     | Working Memory |
| Serial addition/subtraction                            | Executive Function     | Working Memory |
| Spatial Delayed Response Task                          | Executive Function     | Working Memory |
| Spatial Span Task                                      | Executive Function     | Working Memory |
| Sternberg                                              | Executive Function     | Working Memory |
| Verbal Runing Span                                     | Executive Function     | Working Memory |
| Visual Spatial Memory                                  | Executive Function     | Working Memory |
| Auditory Choice RT                                     | Information Processing | -              |
| Choice RT Task                                         | Information Processing | -              |
| CogState Battery Choice RT Task                        | Information Processing | -              |
| CogState Battery Detection Task                        | Information Processing | -              |
| Simple RT Task                                         | Information Processing | -              |
| Repeated Acquisition                                   | Learning               | -              |
| Embedded Triplet Learning Task                         | Memory                 | -              |

|                                                           |              |   |
|-----------------------------------------------------------|--------------|---|
| Implicit Vocabulary Learning Task                         | Memory       | - |
| Motor Skill Acquisition                                   | Memory       | - |
| Multiple Choice Test                                      | Memory       | - |
| Auditory Tone Familiarity                                 | Memory       | - |
| Brief Visuospatial Memory Test-Revised                    | Memory       | - |
| California Verbal Learning Test II                        | Memory       | - |
| Code Substitution Delayed                                 | Memory       | - |
| Customized Online Vocabulary Test                         | Memory       | - |
| Deese-Roediger-McDermott Paradigm (Recall<br>25 min post) | Memory       | - |
| Recall Tasks                                              | Memory       | - |
| Recognition Tasks                                         | Memory       | - |
| Rey Auditory Verbal Learning Test                         | Memory       | - |
| Soccer specific decision making task                      | Memory       | - |
| Word Association                                          | Memory       | - |
| Kicking Accuracy Test                                     | Motor Skills | - |
| Rifle Shooting                                            | Motor Skills | - |
| Shooting Accuracy                                         | Motor Skills | - |
| Luminance Discrimination Task                             | Perception   | - |
| Critical Flicker Fusion                                   | Perception   | - |
| Detection Task                                            | Perception   | - |
| Hybrid Flanker/Load Task                                  | Perception   | - |
| Simple Visual-discrimination task                         | Perception   | - |
| Visual Consciousness                                      | Perception   | - |

---
